# Supplementary material for: Characterization of Musts, Wines, and Sparkling Wines Based on Their Elemental Composition Determined by ICP-OES and ICP-MS
Source: MDPI journal article supplement (doi:10.3390/beverages8010003), 2022-01-04
Supplement: s1 [file s1]

*Supplementary Material*

## **Characterization of musts, wines, and sparkling wines based on their elemental composition determined by ICP-OES and ICP-MS**

**Biel Granell<sup>1</sup>, Anaïs Izquierdo-Llopart<sup>1</sup>, Àngels Sahuquillo<sup>1</sup>, J. Fermín López-Sánchez<sup>1</sup>, Javier Saurina<sup>1,2,\*</sup>**

<sup>1</sup> Department of Chemical Engineering and Analytical Chemistry, University of Barcelona, Martí i Franquès 1-11, E08028 Barcelona, Spain. biel.granell@gmail.com; anais.izquierdo.llopart@gmail.com; angels.sahuquillo@ub.edu; fermin.lopez@ub.edu; xavi.saurina@ub.edu

<sup>2</sup> Research Institute in Food Nutrition and Food Safety, University of Barcelona, Av. Prat de la Riba 171, Edifici Recerca (Gaudí), E08921 Santa Coloma de Gramenet, Spain.

\* Correspondence: xavi.saurina@ub.edu

**Table S1.** Main geographical and agricultural characteristics of vineyards of Xarel·lo samples.

| Vineyard classification according to quality | A                                                                                                                                                             | B                                                                                                                                     | C                                                                                                                                                                                      | D                                                                                                                                  |
|----------------------------------------------|---------------------------------------------------------------------------------------------------------------------------------------------------------------|---------------------------------------------------------------------------------------------------------------------------------------|----------------------------------------------------------------------------------------------------------------------------------------------------------------------------------------|------------------------------------------------------------------------------------------------------------------------------------|
| Reference/Name                               | AK627/La Fideuera                                                                                                                                             | AB264/Peixo-Montagull                                                                                                                 | IB657/Pla-Les Cabanyes                                                                                                                                                                 | AU095/Mateu-Refugi vell                                                                                                            |
| Main characteristics                         | Homogeneous vineyard, good transparency of vegetation (40%), grapes do not touch between vines, breezy and slightly shaded, 15 sprouts/m, length of 80-100 cm | Homogeneous vineyard, with good transparency of vegetation, grapes are breezy and slightly shaded, 15 sprouts/m, length of 80-100 cm. | Homogeneous vineyard, with good transparency of vegetation, grapes are breezy and slightly shaded, some vines touch each other but they are not packed, 20 sprouts/m, length of 110 cm | No homogeneous vineyard with an excess of vegetation, grapes hidden from the Sun, no breezy, over 20 sprouts/m, length over 150 cm |
| Type of soil                                 | Calcareous/clayey                                                                                                                                             | Calcareous/clayey                                                                                                                     | Calcareous/clayey                                                                                                                                                                      | Calcareous/clayey                                                                                                                  |
| Agricultural practices                       | Ecological faming                                                                                                                                             | Ecological faming                                                                                                                     | Conventional faming                                                                                                                                                                    | Ecological faming                                                                                                                  |
| Geographical location                        | Olèrdola (Penedès)                                                                                                                                            | Subirats (Penedès)                                                                                                                    | Les cabanyes (Penedès)                                                                                                                                                                 | Santa Margarida i els Monjos (Penedès)                                                                                             |
| Climate                                      | Mediterranean                                                                                                                                                 | Mediterranean                                                                                                                         | Mediterranean                                                                                                                                                                          | Mediterranean                                                                                                                      |
| Vineyard altitude                            | 210 m                                                                                                                                                         | 225 m                                                                                                                                 | 270 m                                                                                                                                                                                  | 180 m                                                                                                                              |
| Conduction system                            | Arbor – <i>Cordó Royat</i>                                                                                                                                    | Traditional vessel                                                                                                                    | Arbor – <i>Cordó Royat</i>                                                                                                                                                             | Arbor – <i>Cordó Royat</i>                                                                                                         |
| Plantation year                              | 1993                                                                                                                                                          | 1965                                                                                                                                  | 2003                                                                                                                                                                                   | 1990                                                                                                                               |
| Yield obtained in the 2019 grape harvest     | 8.000 kg/ha                                                                                                                                                   | 10.000 kg/ha                                                                                                                          | 12.000 kg/ha                                                                                                                                                                           | 12.000 kg/ha                                                                                                                       |

**Table S2.** Main geographical and agricultural characteristics of vineyards of Pinot Noir samples.

| Vineyard classification according to quality | A                                                                                                   | B                                                                                                      | C                                                                                                          | D                                                                                                                          |
|----------------------------------------------|-----------------------------------------------------------------------------------------------------|--------------------------------------------------------------------------------------------------------|------------------------------------------------------------------------------------------------------------|----------------------------------------------------------------------------------------------------------------------------|
| Reference/Name                               | <b>DOC-PN-15/La Pleta</b>                                                                           | <b>SAL-PN-F3</b>                                                                                       | <b>SAL-PN-84</b>                                                                                           | <b>VAL-PN-SAIRA</b>                                                                                                        |
| Main characteristics                         | Very balanced old vineyard, where all is done manually is removing the excess of sprouts and grapes | Young vine in which during the spring the excess of sprouts and grapes are removed                     | Young vine in which during the spring the excess of sprouts are removed to homogenize the remaining grapes | Old vine but very heterogeneous, in which only the necessary actions to guarantee the health of the grapes are carried out |
| Type of soil                                 | Frank and granular texture, consisting of lutites between 1-2 m                                     | Limestone soil, frank and clayey, with large calcareous rocks on the surface and lutites between 1-2 m | Limestone soil, frank and clayey, with large calcareous rocks on the surface and lutites between 1-2 m     | Frank and granular texture, consisting of lutites between 1-2 m                                                            |
| Agricultural practices                       | Conversion                                                                                          | Ecological                                                                                             | Integrated production                                                                                      | Integrated production                                                                                                      |
| Geographical location                        | Raimat                                                                                              | Raimat                                                                                                 | Raimat                                                                                                     | Raimat                                                                                                                     |
| Climate                                      | Continental, semiarid                                                                               | Continental, semiarid                                                                                  | Continental, semiarid                                                                                      | Continental, semiarid                                                                                                      |
| Vineyard altitude                            | 280 m                                                                                               | 280 m                                                                                                  | 280 m                                                                                                      | 315 m                                                                                                                      |
| Conduction system                            | <i>Royat Doble</i>                                                                                  | <i>Royat Doble</i>                                                                                     | <i>Royat Doble</i>                                                                                         | <i>Royat Doble</i>                                                                                                         |
| Plantation year                              | 1991                                                                                                | 2010                                                                                                   | 2014                                                                                                       | 1999                                                                                                                       |
| Yield obtained in the 2019 grape harvest     | 5.600 kg/ha                                                                                         | 7.800 kg/ha                                                                                            | 12.520 kg/ha                                                                                               | 6.620 kg/ha                                                                                                                |
